# Supplementary material
Source: PubMed Central journal article supplement (PMC5704964)

# Supplemental Figure 7

**A**

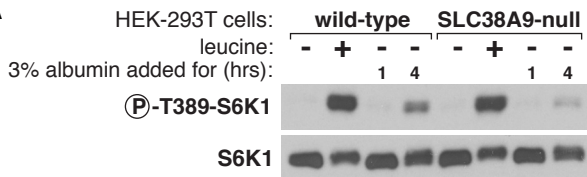

**B**

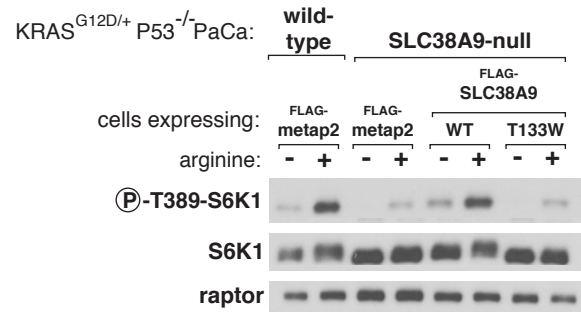

**C**

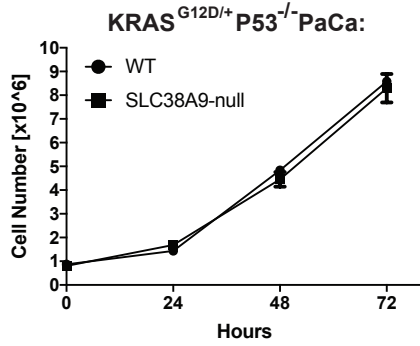

**D**

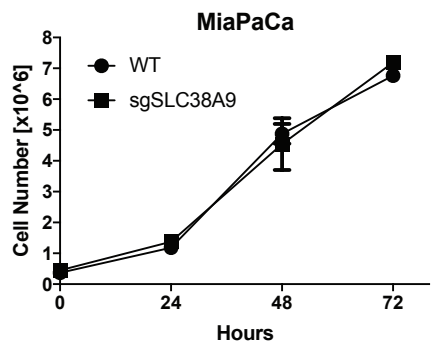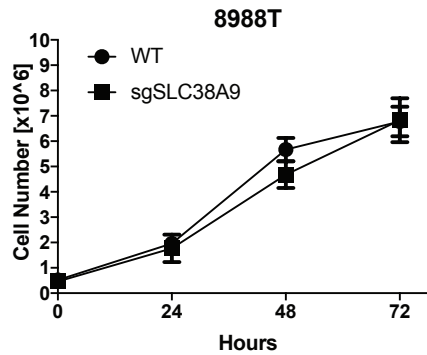

**E**

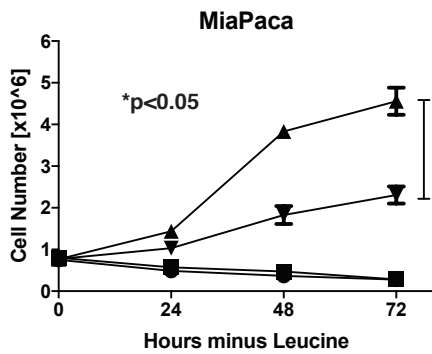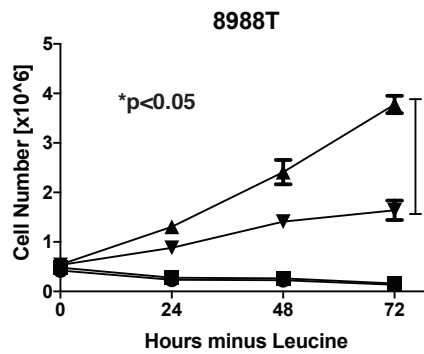

● WT (-leucine)  
 ■ sgSLC38A9 (-leucine)  
 ▲ WT (-leucine + 3%Albumin)  
 ▼ sgSLC38A9 (-leucine+ 3% Albumin)

**F**

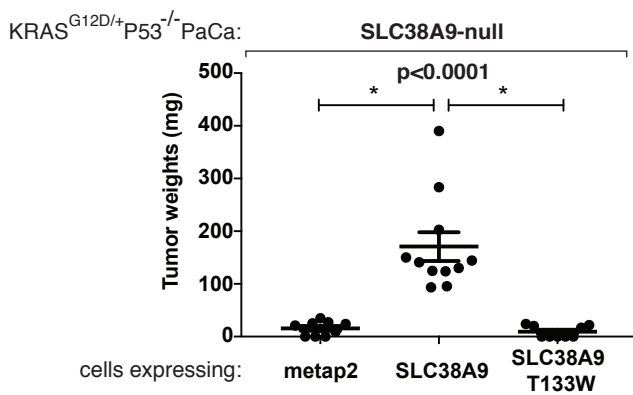

Supplement: NIHMS915522-supplement-Supp_Figure_7.pdf [file NIHMS915522-supplement-Supp_Figure_7.pdf]
