# Supplementary material
Source: PubMed Central journal article supplement (PMC5704964)

# Supplemental Figure 1

**A**

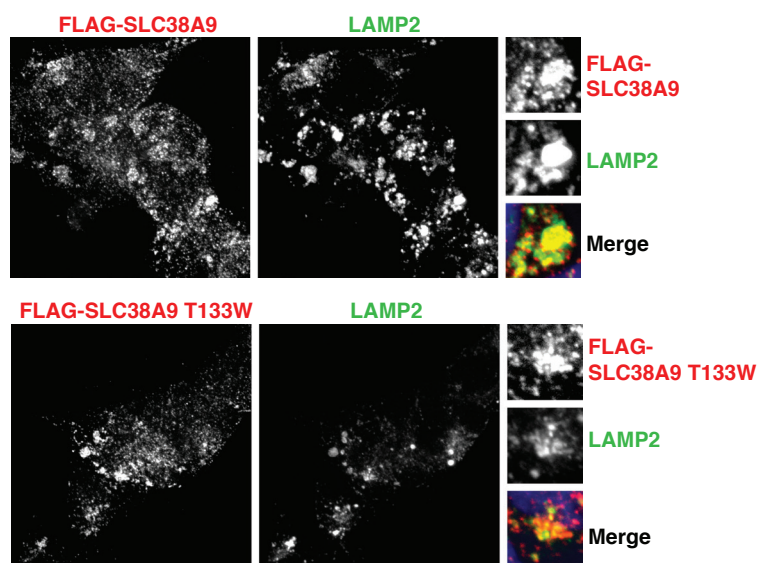

Supplement: NIHMS915522-supplement-Supp_Figure_1.pdf [file NIHMS915522-supplement-Supp_Figure_1.pdf]

# Supplemental Figure 2

**A**

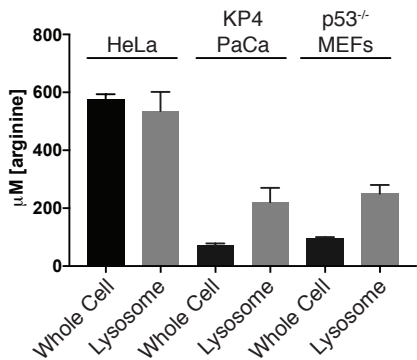

**B**

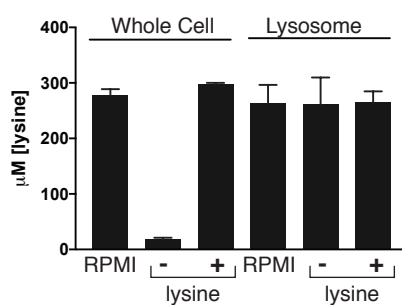

**C**

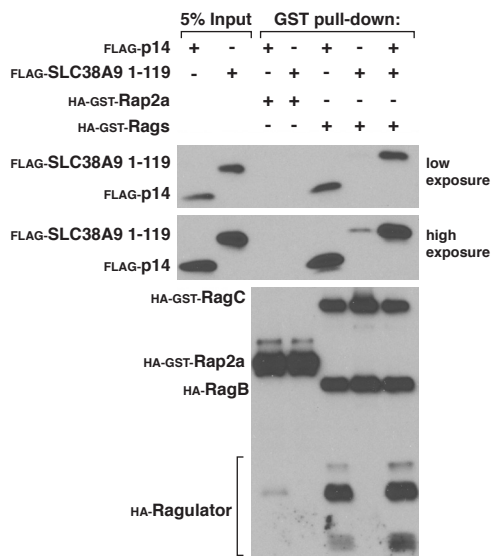

**D**

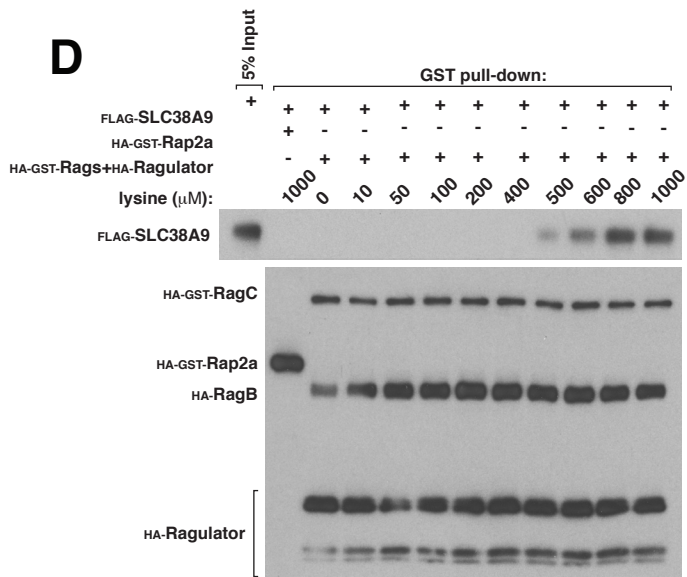

**E**

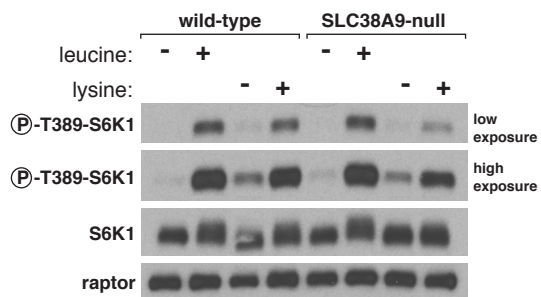

Supplement: NIHMS915522-supplement-Supp_Figure_2.pdf [file NIHMS915522-supplement-Supp_Figure_2.pdf]

# Supplemental Figure 3

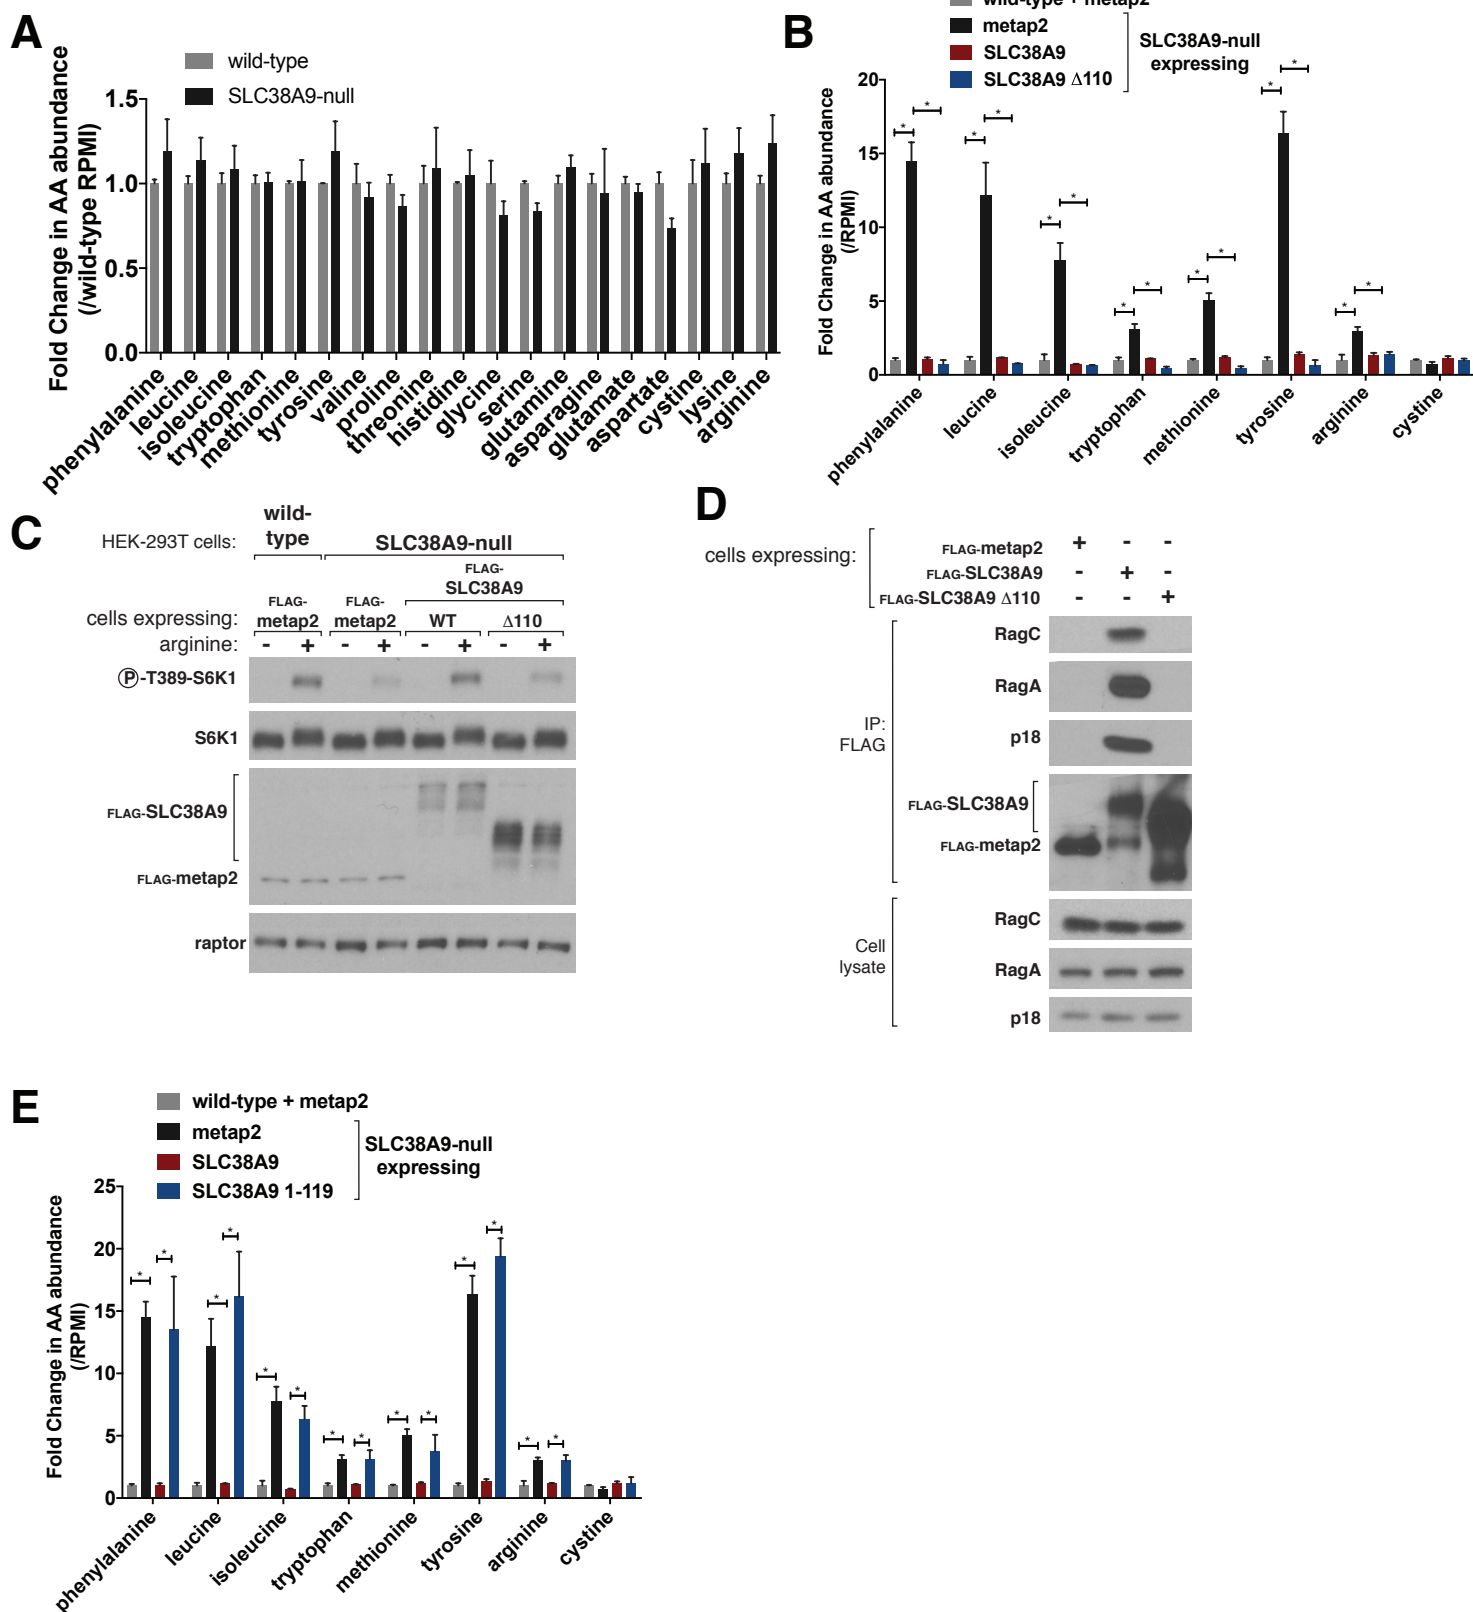

Supplement: NIHMS915522-supplement-Supp_Figure_3.pdf [file NIHMS915522-supplement-Supp_Figure_3.pdf]

# Supplemental Figure 4

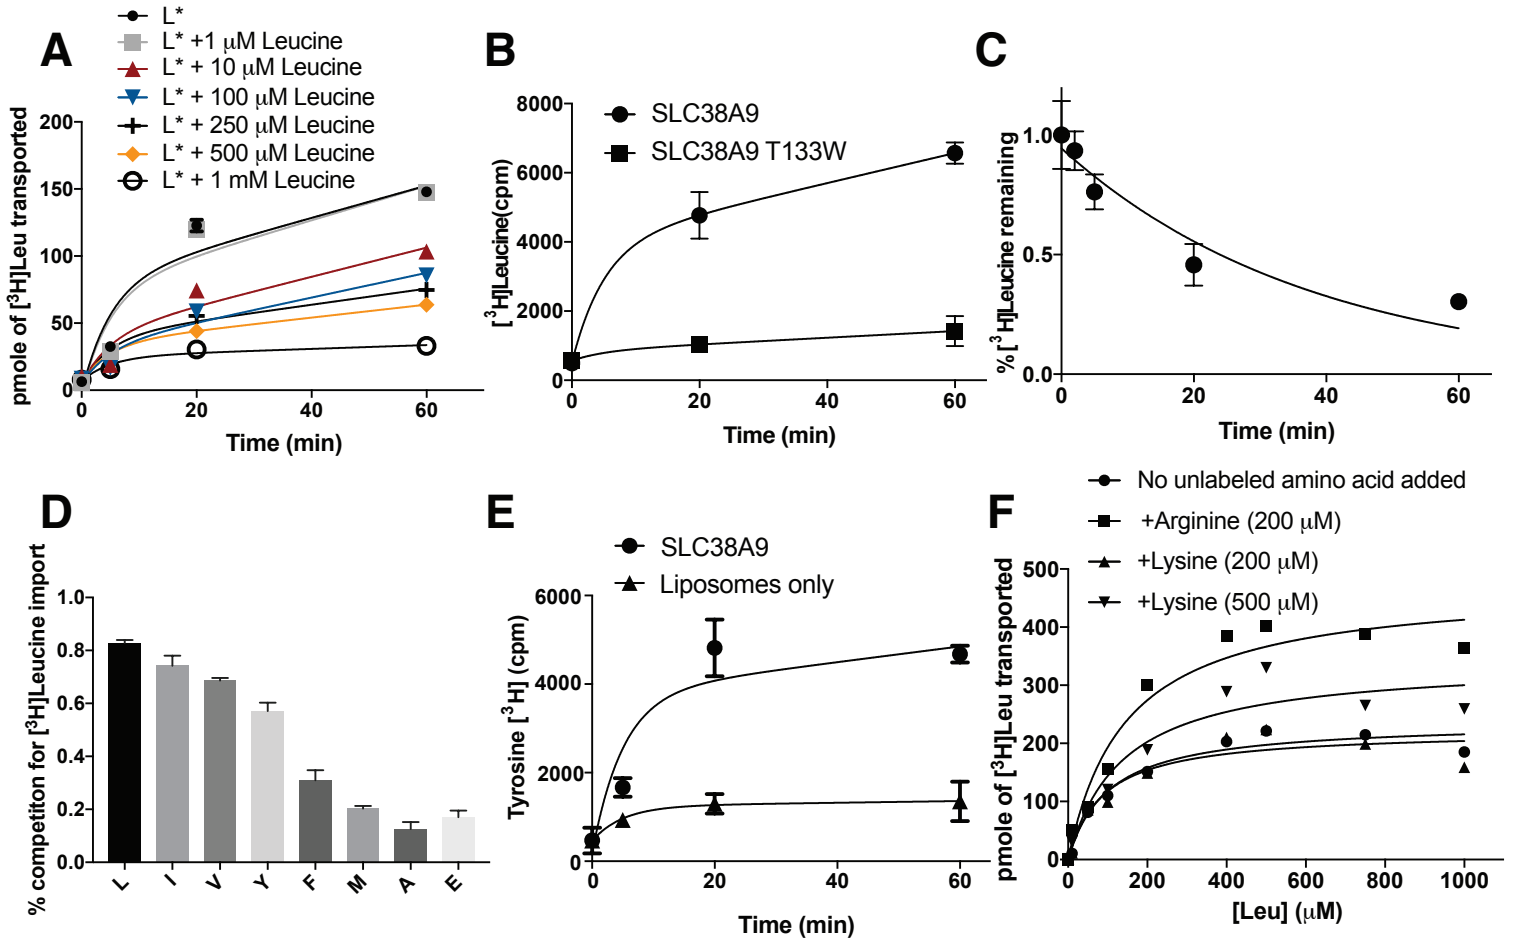

Supplement: NIHMS915522-supplement-Supp_Figure_4.pdf [file NIHMS915522-supplement-Supp_Figure_4.pdf]

# Supplemental Figure 5

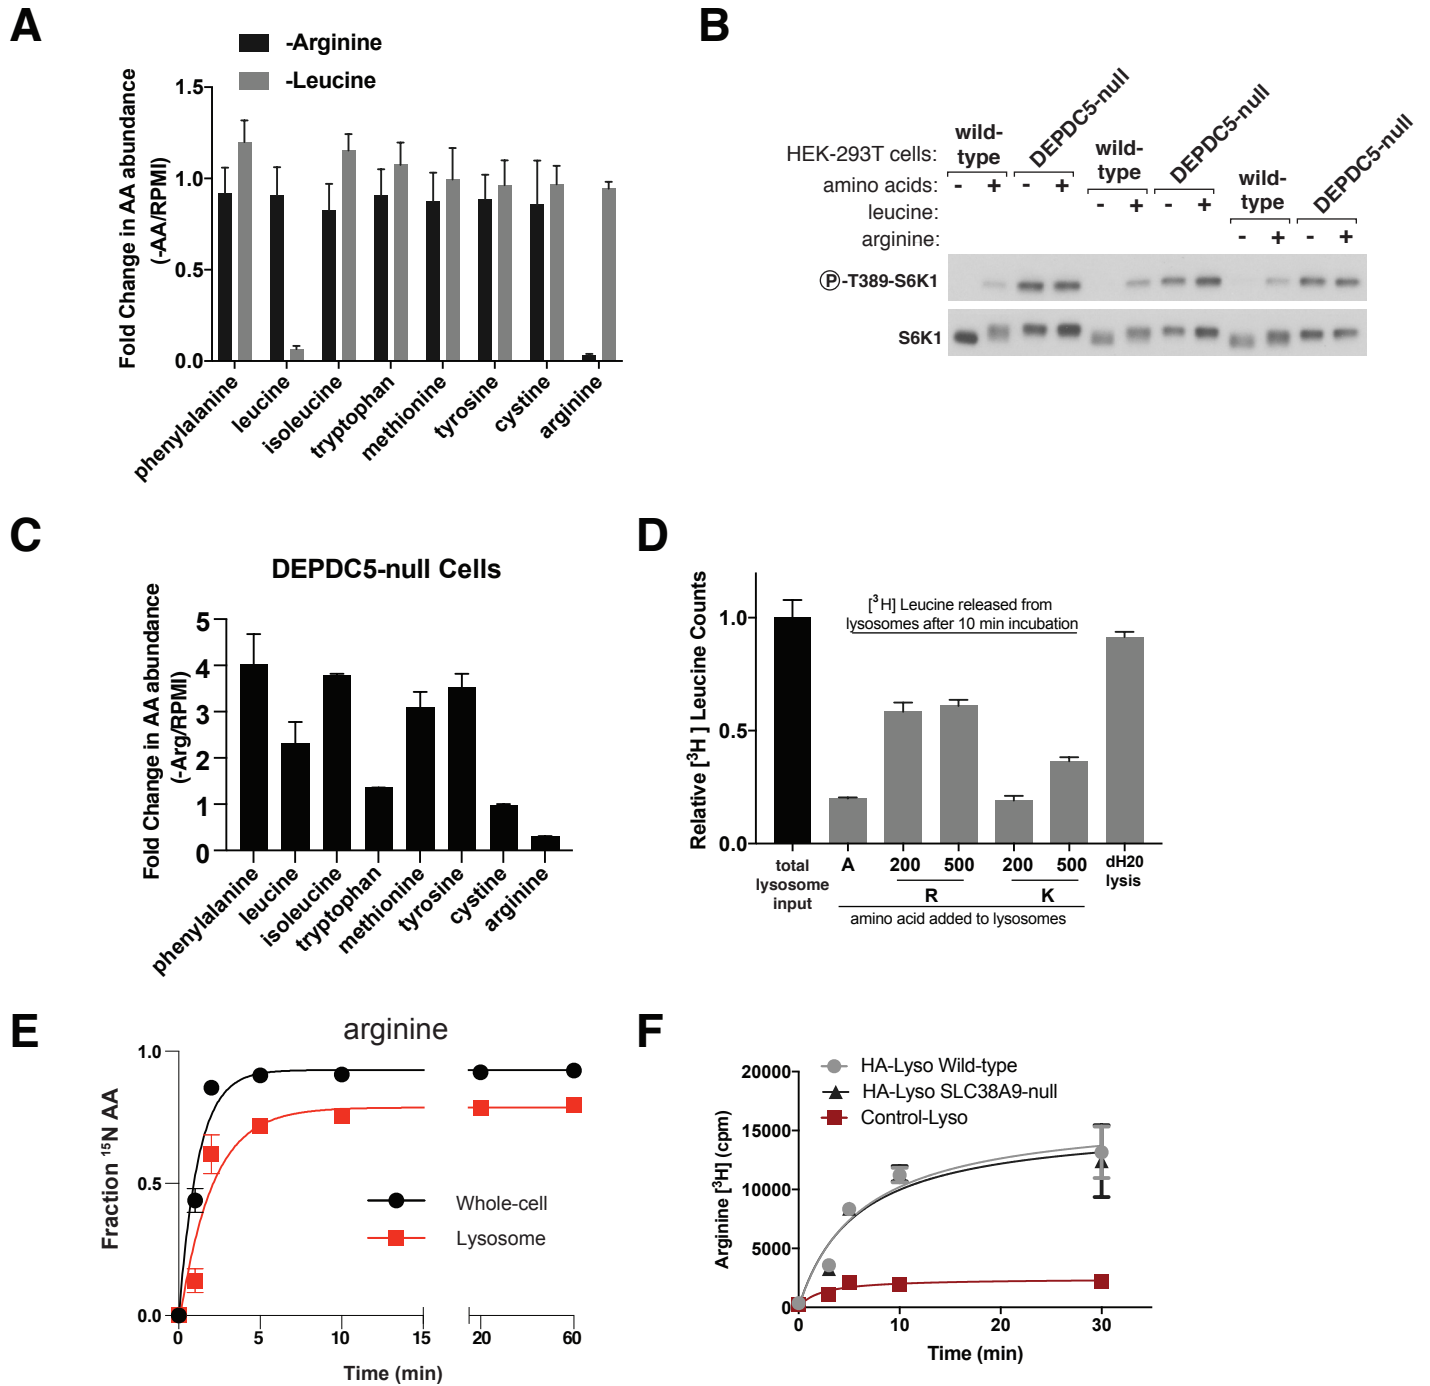

Supplement: NIHMS915522-supplement-Supp_Figure_5.pdf [file NIHMS915522-supplement-Supp_Figure_5.pdf]

# Supplemental Figure 6

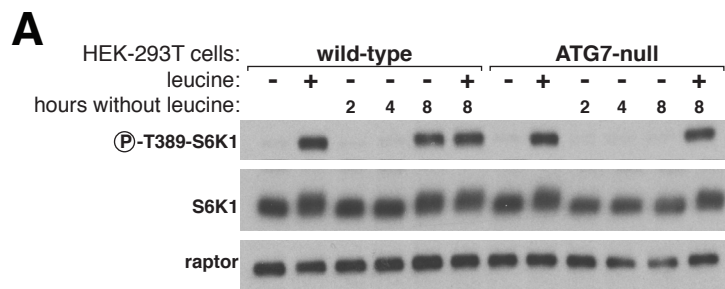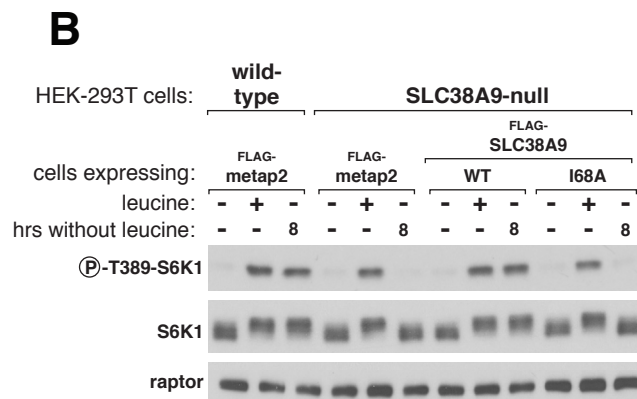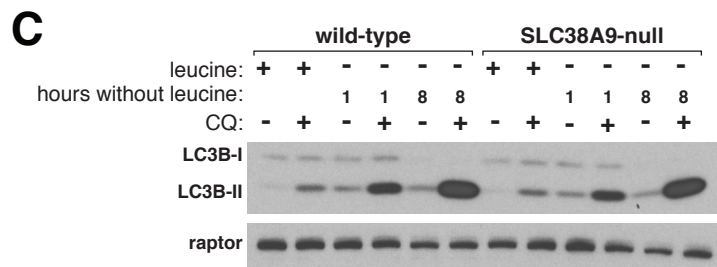

Supplement: NIHMS915522-supplement-Supp_Figure_6.pdf [file NIHMS915522-supplement-Supp_Figure_6.pdf]
